1            ***Efficient enrichment cloning of TAL effector genes from Xanthomonas***

2                            Tuan Tu Tran, Hinda Doucouré, Mathilde Hutin, Boris Szurek,

3                                            Sébastien Cunnac, and Ralf Koebnik\*

4    IRD, Cirad, University of Montpellier, IPME, Montpellier, France

5

6    \*Corresponding author

7

8

9    Corresponding author: R. Koebnik: Tel.: +33 4 67 41 62 28, E-mail: koebnik@gmx.de

10

11 **ABSTRACT**

12 Many plant-pathogenic xanthomonads use a type III secretion system to translocate  
13 Transcription Activator-Like (TAL) effectors into eukaryotic host cells where they act as  
14 transcription factors. Target genes are induced upon binding of a TAL effector to double-  
15 stranded DNA in a sequence-specific manner. DNA binding is governed by a highly repetitive  
16 protein domain, which consists of an array of nearly identical repeats of ca. 102 base pairs.  
17 Many species and pathovars of *Xanthomonas*, including pathogens of rice, cereals, cassava,  
18 citrus and cotton, encode multiple TAL effectors in their genomes. Some of the TAL effectors  
19 have been shown to act as key pathogenicity factors, which induce the expression of  
20 susceptibility genes to the benefit of the pathogen. However, due to the repetitive character  
21 and the presence of multiple gene copies, high-throughput cloning of TAL effector genes  
22 remains a challenge. In order to isolate complete TAL effector gene repertoires, we developed  
23 an enrichment cloning strategy based on

- 24 • genome-informed *in silico* optimization of restriction digestions,
- 25 • selective restriction digestion of genomic DNA, and
- 26 • size fractionation of DNA fragments.

27 Our rapid, cheap and powerful method allows efficient cloning of TAL effector genes from  
28 xanthomonads, as demonstrated for two rice-pathogenic strains of *Xanthomonas oryzae* from  
29 Africa.

30

31

32 **METHOD NAME**

33 TAL fishing

34

35 **KEYWORDS**

36 Enrichment cloning; Type III secretion; Type III effector; TAL effector; TALome;  
37 *Xanthomonas*; Bacterial leaf blight; Bacterial leaf streak; Rice

38

39 **METHOD OVERVIEW**

40 In previous studies, a few *tal* genes were isolated from African strains of *Xanthomonas*  
41 *oryzae*. Among them, only *tal5* from MAI1 and *talC* from BAI3 have been characterized as  
42 major virulence TAL effectors [1, 2]. These studies relied on screening of genomic DNA  
43 cosmid libraries to isolate and sequence *tal* genes, which is a laborious and time-consuming  
44 process. Due to the presence of multiple, very similar *tal* genes in *X. oryzae* strains and due to  
45 their highly repetitive character, PCR amplification is not feasible [3]. Recently, a method  
46 based on size fractionation of restriction-digested genomic DNA was developed, which made  
47 use of two conserved BamHI restriction sites, one at the ATG start codon and another one  
48 approximately 150 bp upstream of the stop codon [4]. Size-fractionated BamHI fragments  
49 (1.5 to 7.5 kb), covering most of the *tal* gene sequence, were cloned into pUC19, followed by  
50 transformation into *Escherichia coli*. Dot blot hybridization revealed that 115 out of 3000  
51 clones contained a *tal* gene (i.e. less than 4%), which was further confirmed by Southern blot  
52 analyses and Sanger DNA sequencing. Here, we improve this method by making use of the  
53 extreme similarity among repeat DNA sequences and the strong conservation of the N- and C-  
54 terminal regions to identify frequently cutting restriction enzymes that do not cut within any  
55 of the *tal* genes. Complete combinatorial digestion of genomic DNA with BamHI and two  
56 additional frequent cutters for counter-selection, followed by size fractionation of DNA

57 fragments allows rapid, cheap and efficient cloning of *tal* gene BamHI fragments from  
58 xanthomonads, as demonstrated with two African strains of *X. oryzae*.

59

### 60 ***In silico* combinatorial restriction digestion**

61 Using BioEdit (<http://www.mbio.ncsu.edu/bioedit/page2.html>), we identified 54 restriction  
62 enzymes that would not cleave in any of 71 *tal* gene BamHI fragments from *X. oryzae* that  
63 were retrieved from GenBank. From this analysis, two restriction enzymes, ApaLI  
64 (GTGCAC) and SfoI (GGCGCC), were selected for further analyses. Genome sequences of  
65 nine *X. oryzae* strains were then used for *in silico* combinatorial restriction digestion using  
66 Microsoft Office software (Microsoft Word and Microsoft Excel) (Table 1). First, each  
67 genome sequence was converted into a consecutive list of BamHI fragments in Word. Upon  
68 conversion from text to table format, all virtual DNA fragments were transferred to an Excel  
69 spreadsheet. In Excel, fragment sizes and absence/presence of ApaLI and SfoI sites were  
70 scored using appropriate formulas. DNA fragments were sorted by the absence/presence of  
71 the two restriction sites and the size of virtual BamHI fragments. *tal* gene-related BamHI  
72 fragments were identified by TBLASTN searches. Finally, data were re-analyzed assuming  
73 isolation of 2 to 5 kb DNA fragments prior to cloning.

74

75 Assuming that only DNA fragments flanked by two BamHI overhangs would be cloned, but  
76 none of the fragments that contain only one BamHI overhang (which could nevertheless occur  
77 by head-to-tail ligation of two fragments flanked by one BamHI overhang and one overhang  
78 from the other two enzymes), one would expect to obtain between 10% and 20% of *tal* gene  
79 BamHI fragments without size fractionation and between 50% and 90% of *tal* gene BamHI  
80 fragments with size fractionation (2 to 5 kb DNA fragments). However, our simulation  
81 revealed that this procedure would miss to isolate *tal*-gene related DNA fragments from

82 truncated *tal* genes (two in PXO86, one in KACC10331, one in BAI11), which nevertheless  
83 are of functional relevance [5, 6]. Most importantly, this method should allow isolation of  
84 BamHI fragments from all full-length *tal* genes, corresponding to the full functional TALome  
85 that induces the expression of resistance or susceptibility genes.

86

### 87 **Bacterial strains, plasmids and growth conditions**

88 The bacterial strains used in this study were *Escherichia coli* DH5a (Stratagene, La Jolla, CA,  
89 USA) and *X. oryzae* strains BAI3 and MAI1 [7]. *E. coli* bacteria were cultivated at 37 °C in  
90 lysogenic broth (LB), *X. oryzae* strains at 28 °C on PSA medium (10 g peptone, 10 g sucrose,  
91 1 g glutamic acid, 16 g agar, 1<sup>l</sup> H<sub>2</sub>O). Antibiotics were used at the following concentrations:  
92 gentamicin, 20 µg/ml.

93

94 Plasmids were introduced into *E. coli* by electroporation and into *X. oryzae* by biparental  
95 conjugation using *E. coli* strain S17-1. The plasmid used to clone *tal* gene BamHI fragments,  
96 pSKX1, was obtained upon digestion of pSXX1-*talC* [2] with BamHI and re-ligation, leading  
97 to a construct where the translational start codon with an overlapping BamHI site  
98 (ATGGATCC, BamHI site underlined) of *talC* is fused to 151 base pairs corresponding to the  
99 3' end of the *talC* open reading frame downstream of the second BamHI site of *talC*.

100

### 101 **DNA extraction**

102 Total genomic DNA of two African *X. oryzae* strains was prepared using the midi-prep  
103 Qiagen<sup>®</sup> genomic DNA preparation protocol for bacteria using Genomic-tips 100/G  
104 (QIAGEN SAS, Courtaboeuf, France). The total genomic DNA was resuspended in 500 µl of  
105 double-distilled H<sub>2</sub>O, aliquoted into several Eppendorf tubes and stored at -30 °C. Plasmid

106 DNA was extracted using QIAprep Spin Miniprep Kit or QIAGEN Plasmid Kit for midiprep  
107 (Qiagen SAS).

108

### 109 **Enrichment cloning of *tal* gene BamHI fragments**

110 20 µg of genomic DNA were digested with BamHI-HF, SfoI and ApaLI in CutSmart<sup>®</sup> Buffer  
111 (New England Biolabs SAS, Enry, France) at 37 °C overnight. The High-Fidelity version of  
112 BamHI was used to avoid star activities upon prolonged incubation. Digestion products were  
113 purified using QIAquick PCR Purification Kit (Qiagen SAS) for column purification or using  
114 the QIAquick Gel Extraction Kit (Qiagen SAS) to isolate 2-5 kb DNA fragments. DNA  
115 fragments were cloned into BamHI-digested pSKX1, which was dephosphorylated by TSAP  
116 thermosensitive alkaline phosphatase (Promega, Charbonnières-les-Bains, France) and  
117 purified using the QIAquick PCR Purification Kit (Qiagen SAS). Upon ligation with T4 DNA  
118 ligase (Promega) at 4 °C overnight, DNA was transformed into *E. coli*. Transformants were  
119 plated onto LB-gentamycin plates and bacterial colonies were screened by PCR for the  
120 presence of a cloned *tal* gene BamHI fragment by polymerase chain reaction (PCR).

121

### 122 **PCR screening of bacteria for cloned *tal* gene BamHI fragments**

123 To assess the presence and orientation of cloned *tal* gene BamHI fragments, two primers pairs  
124 were used in PCR assays. Firstly, primers pthXo1-nt-Fw1 (5'-  
125 GCAGCTTCAGCGATCTGCTC) and PthXo1-nt-rev2 (5'-  
126 TCAGGGGGGCACCCGTCAGT) were used to amplify a DNA fragment of approximately  
127 590 to 660 bp corresponding to the highly conserved N-terminal region of all *X. oryzae* TAL  
128 effectors (size variation is due to an in-frame deletion in a few *tal* genes). Amplification was  
129 carried out with an initial denaturation step of 5 min at 95 °C, 30 cycles of 30 s at 95 °C, 30 s  
130 at 62 °C, and 45 s at 72 °C, and a final elongation step of 10 min at 72 °C. Secondly, to

131 determine the orientation of the cloned *tal* gene BamHI fragment in pSKX1, primer AvrXa7-  
132 Ct-Fw2 (5'-GCGTTGGCCGCGTTGACCAA), which anneals to the 3' end of the cloned *tal*  
133 gene BamHI fragment, and pSKX1-Rev (5'-gggcaccaataactgcctta-3'), which anneals to the  
134 plasmid vector pSKX1, were used to amplify a DNA fragment of approximately 904 bp when  
135 a *tal* gene BamHI fragment is inserted in frame with the 3' portion of the vector-borne *talC*  
136 fragment. Amplification was carried out with an initial denaturation step of 5 min at 95 °C, 30  
137 cycles of 30 s at 95 °C, 30 s at 64 °C, and 1 min at 72 °C, and a final elongation step of 10  
138 min at 72 °C. The empty vector, pSKX1, and a plasmid containing the *tal5* gene from strain  
139 MAI1, pSKX1-*tal5*, served as negative and positive control, respectively.

140

#### 141 **DNA sequencing of cloned *tal* gene BamHI fragments**

142 Plasmid DNA from positive colonies in the first PCR assay was digested with BamHI to  
143 estimate the insert size and thus, the expected number of repeats, via gel electrophoresis in a  
144 1.2 % agarose gel. Repeat regions were Sanger sequenced from both sides with two  
145 oligonucleotide primers: forward (5'-GCCGGATCAGGGCGAGATAACT) and reverse (5'-  
146 CACTGACGGGTGCCCCCTGAA). Plasmid DNA from in-frame clones, as revealed by  
147 the second PCR assay, were Sanger sequenced from both sides of vector using primers  
148 pSKX1-For (5'-GGCACGACAGGGTTTTCCCGAC) and pSKX1-Rev (5'-  
149 GGGCACCAATAACTGCCTTA).

150

#### 151 **Restriction fragment length polymorphism analyses**

152 To confirm that the two counter-selection restriction enzymes, ApaLI and SfoI, do not cut  
153 within *tal* gene BamHI fragments, we performed restriction fragment length polymorphism  
154 (RFLP) analyses. 3 µg of single (BamHI) or triple (BamHI, ApaLI and SfoI) digested  
155 genomic DNA of the African *X. oryzae* strains BAI3 and MAI1 were electrophoretically

156 separated on 0.8% agarose gels in  $0.5 \times$  TBE (Tris-Boris-EDTA) buffer at 25 V for 84 h at 4  
157 °C. Upon DNA fragments were transferred to an Amersham Hybond-N+ membrane by  
158 Southern blotting (GE Healthcare, Vélizy-Villacoublay, France). A 663-bp fragment of the  
159 *tal5* gene was PCR-amplified and digoxigenin-labeled with DIG-High Prime (Roche  
160 Diagnostics, Meylan, France) using primers pthXo1-nt-Fw1 and PthXo1-nt-rev2, as described  
161 above.

162

### 163 **Efficiency of *tal* gene BamHI fragment enrichment cloning**

164 As a proof-of-concept, we applied our strategy to two African strains of *X. oryzae*, BAI3 and  
165 MAI1 [7]. 20 µg of genomic DNA of MAI1 was digested with BamHI only or in combination  
166 with ApaLI/SfoI, respectively. The digestion products were aliquoted and subjected to two  
167 independent purification treatments, i.e. column (total fragments) and gel purification (2 to 5  
168 kb fragments). Both sets of DNA fragments were ligated into plasmid pSKX1. As shown in  
169 Table 2, *tal* gene-harboring colonies were rarely detected in both single BamHI digestion  
170 treatments (yielding 0.6% and 0.8% for column purification and gel purification,  
171 respectively). Upon combinatorial digestion, column purification resulted in 10 *tal* gene-  
172 positive clones among 324 tested colonies (3.1%). Strikingly, counter-selection digestion  
173 combined with size fractionation resulted in 28 out of 89 *tal* gene-positive colonies (31.5%),  
174 as revealed by PCR screening. Cloned DNA fragments of all 28 positive colonies were  
175 sequenced from both sides using primers that anneal to the plasmid vector, thus confirming  
176 the presence of *tal* gene BamHI fragments in all *tal* gene-positive colonies. Similar results  
177 were obtained when the enrichment cloning was repeated for strain MAI1 (25.0% *tal* gene-  
178 positive colonies) and applied to strain BAI3 (26.9% *tal* gene-positive colonies) (Table 2),  
179 thus demonstrating superiority of the new method over previous cloning approaches.

180



181 **Additional information**

182 **Background information and significance of the method**

183 Strains of *Xanthomonas* spp. cause important diseases of many economically important crop  
184 and ornamental plants. In most cases, pathogenicity depends of a set of type III effector  
185 proteins, which are injected into host cells via a molecular syringe, the type III secretion  
186 system (T3SS). Among all the type III effectors, one class is of particular interest for  
187 *Xanthomonas*: the Transcription Activator-Like (TAL) effectors. TAL effectors are conserved  
188 in many *Xanthomonas* spp and some of them have been shown to significantly contribute to  
189 pathogenicity [8]. Upon injection via the T3SS, TAL effectors localize into the host nucleus  
190 to directly or indirectly activate the expression of specific host genes [9, 10]. Among them are  
191 so-called susceptibility (*S*) genes, the induction of which promotes bacterial colonization in  
192 the affected plant tissues and/or development of disease symptoms [11].

193

194 Plant gene induction by TAL effectors depends on their central repeat region as well as C-  
195 terminally located nuclear localization signals and an activation domain [8]. The central  
196 repeat region is composed by almost identical tandem repeats (typically ranging from 33 to 35  
197 amino acids) where residues at positions 12 and 13 are hypervariable, also referred to as  
198 repeat variable di-residues (RVDs). As demonstrated by the TAL effector-DNA binding code,  
199 the string of RVDs of each TAL effector determines the DNA sequence (or effector binding  
200 element, EBE) to which it binds [12, 13]. Upon refinement of the code, various *in silico*  
201 platforms were developed that allow prediction of TAL effector target genes in complex plant  
202 genomes [14, 15, 16]. In order to understand the collective function and evolution of TAL  
203 effector genes, there is a need to isolate and sequence complete repertoires of TAL effectors  
204 (e.g. TALomes) from multiple strains of *Xanthomonas*. Yet, efficient cloning was hampered  
205 by the facts that the genes have a highly repetitive structure and that most strains contain

206 multiple copies of TAL effectors, thus limiting the usefulness of PCR-based approaches [3].  
207 Recently, long-read, single molecule, real-time (SMRT), a.k.a. PacBio sequencing technology  
208 emerged as a new strategy for full TALome sequencing [17, 18, 19]. Yet, functional studies  
209 require the molecular cloning of *tal* genes. Here, we obtained the full TALome of strain  
210 MAI1 in only two weeks. Remarkably, this protocol can easily be parallelized and the  
211 obtained clones in the expression vector pSKX1 can directly be used in pathogenicity assays.  
212 Consequently, our new enrichment cloning procedure is expected to spur TALome research  
213 by allowing medium-throughput TALome cloning.

214

215 Despite the fact that the procedure was developed for strains of *X. oryzae*, it can easily be  
216 adapted to other xanthomonads as long as the sequence for a few *tal* genes is known, thus  
217 allowing to find appropriate restriction enzymes for counter-selection. Before use of new  
218 enzyme combinations it is recommended to perform Southern blot analyses comparing single  
219 and multiple digested DNA samples in order to avoid enzymes that would cleave within the  
220 *tal* gene BamHI fragments.

221

222

## 223 **Acknowledgements**

224 We are grateful to thank Jonathan M. Jacobs for valuable comments.

225

226

227 **REFERENCES**

- 228 [1] Y. Yu, J. Streubel, S. Balzergue, A. Champion, J. Boch, R. Koebnik, J. Feng, V.  
229 Verdier, B. Szurek  
230 **Colonization of rice leaf blades by an African strain of *Xanthomonas oryzae* pv.**  
231 ***oryzae* depends on a new TAL effector that induces the rice nodulin-3 *Os11N3***  
232 **gene.**  
233 Mol. Plant. Microbe. Interact., 24 (2011), pp. 1102–1113
- 234 [2] J. Streubel, C. Pesce, M. Hutin, R. Koebnik, J. Boch, B. Szurek  
235 **Five phylogenetically close rice *SWEET* genes confer TAL effector-mediated**  
236 **susceptibility to *Xanthomonas oryzae* pv. *oryzae*.**  
237 New Phytol., 200 (2013), pp. 808–819
- 238 [3] C.M. Hommelsheim, L. Frantzeskakis, M. Huang, B. Ülker  
239 **PCR amplification of repetitive DNA: a limitation to genome editing technologies**  
240 **and many other applications.**  
241 Sci. Rep., 4 (2014), p. 5052
- 242 [4] Y.H. Yu, Y. Lu, Y.Q. He, S. Huang, J.L. Tang  
243 **Rapid and efficient genome-wide characterization of *Xanthomonas* TAL effector**  
244 **genes.**  
245 Sci. Rep., 5 (2015), p. 13162.
- 246 [5] A.C. Read, F.C. Rinaldi, M. Hutin, Y.Q. He, L.R. Triplett, A.J. Bogdanove  
247 **Suppression of *Xo1*-mediated disease resistance in rice by a truncated, non-DNA-**  
248 **binding TAL effector of *Xanthomonas oryzae*.**  
249 Front. Plant Sci., 7 (2016) p. 1516
- 250 [6] Z. Ji, C. Ji, B. Liu, L. Zou, G. Chen, B. Yang  
251 **Interfering TAL effectors of *Xanthomonas oryzae* neutralize *R*-gene-mediated**  
252 **plant disease resistance.**  
253 Nat. Commun. 7 (2016) p. 13435.
- 254 [7] C. Gonzalez, B. Szurek, C. Manceau, T. Mathieu, Y. Séré, V. Verdier  
255 **Molecular and pathotypic characterization of new *Xanthomonas oryzae* strains**  
256 **from West Africa.**  
257 Mol. Plant. Microbe. Interact., 20 (2007), pp. 534–546.
- 258 [8] J. Boch, U. Bonas  
259 ***Xanthomonas* AvrBs3 family-type III effectors: discovery and function.**  
260 Annu. Rev. Phytopathol., 48 (2010), pp. 419–436.
- 261 [9] A.J. Bogdanove, S. Schornack, T. Lahaye  
262 **TAL effectors: finding plant genes for disease and defense.**  
263 Curr. Opin. Plant Biol., 13 (2010), pp. 394–401.
- 264 [10] J. Boch, U. Bonas, T. Lahaye  
265 **TAL effectors - pathogen strategies and plant resistance engineering.**  
266 New Phytol., 204 (2014), pp. 823–832.
- 267 [11] M. Hutin, A.L. Pérez-Quintero, C. Lopez, B. Szurek  
268 **MorTAL Kombat: the story of defense against TAL effectors through loss-of-**  
269 **susceptibility.**  
270 Front. Plant Sci., 6 (2015), p. 535.
- 271 [12] J. Boch, H. Scholze, S. Schornack, A. Landgraf, S. Hahn, S. Kay, T. Lahaye, A.  
272 Nickstadt, U. Bonas  
273 **Breaking the code of DNA binding specificity of TAL-type III effectors.**  
274 Science, 326 (2009), pp. 1509–1512.
- 275 [13] M.J. Moscou, A.J. Bogdanove

- 276 **A simple cipher governs DNA recognition by TAL effectors.**  
277 Science, 326 (2009), p. 1501.
- 278 [14] A.L. Pérez-Quintero, L.M. Rodríguez-R, A. Dereeper, C. López, R. Koebnik, B.  
279 Szurek, S. Cunnac  
280 **An improved method for TAL effectors DNA-binding sites prediction reveals**  
281 **functional convergence in TAL repertoires of *Xanthomonas oryzae* strains.**  
282 PLoS One, 8 (2013), p. e68464.
- 283 [15] J. Grau, A. Wolf, M. Reschke, U. Bonas, S. Posch, J. Boch  
284 **Computational predictions provide insights into the biology of TAL effector**  
285 **target sites.**  
286 PLoS Comput. Biol., 9 (2013), p. e1002962.
- 287 [16] N.J. Booher, A.J. Bogdanove  
288 **Tools for TAL effector design and target prediction.**  
289 Methods, 69 (2014), pp. 121–127.
- 290 [17] N.J. Booher, S.C.D. Carpenter, R.P. Sebra, L. Wang, S.L. Salzberg, J.E. Leach, A.J.  
291 Bogdanove  
292 **Single molecule real-time sequencing of *Xanthomonas oryzae* genomes reveals a**  
293 **dynamic structure and complex TAL (transcription activator-like) effector gene**  
294 **relationships.**  
295 MGen, 1 (2015), p. mgen.0.000032. {PXO99A PXO86 CFBP7342 BLS256}
- 296 [18] K.E. Wilkins, N.J. Booher, L. Wang, A.J. Bogdanove  
297 **TAL effectors and activation of predicted host targets distinguish Asian from**  
298 **African strains of the rice pathogen *Xanthomonas oryzae* pv. *oryzicola* while strict**  
299 **conservation suggests universal importance of five TAL effectors.**  
300 Front. Plant Sci., 6 (2015), p. 536.
- 301 [19] J. Grau, M. Reschke, A. Erkes, J. Streubel, R.D. Morgan, G.G. Wilson, R. Koebnik, J.  
302 Boch  
303 **AnnoTALE: bioinformatics tools for identification, annotation, and nomenclature**  
304 **of TALEs from *Xanthomonas* genomic sequences.**  
305 Sci. Rep., 6 (2016), p. 21077.  
306  
307

| Clade                                                  | African <i>X. oryzae</i> pv. <i>oryzae</i> |              |                                   | Asian <i>X. oryzae</i> pv. <i>oryzae</i> |                               |                          |                             | <i>X. oryzae</i> pv. <i>oryzicola</i> |                             |
|--------------------------------------------------------|--------------------------------------------|--------------|-----------------------------------|------------------------------------------|-------------------------------|--------------------------|-----------------------------|---------------------------------------|-----------------------------|
| Origin                                                 | Mali                                       | Burkina Faso | Cameroon                          | Philippines                              | Philippines                   | Korea                    | Japan                       | Philippines                           | Burkina Faso                |
| Strain                                                 | MAI1                                       | BAI3         | AXO1947                           | PXO86                                    | PXO99 <sup>A</sup>            | KACC 10331               | MAFF 311018                 | BLS256                                | BAI11                       |
| Accession number                                       | pending                                    | pending      | CP013666                          | CP007166                                 | CP000967                      | AE013598                 | AP008229                    | CP003057                              | CP007221                    |
| Sequencing technology                                  | PacBio                                     | PacBio       | PacBio                            | PacBio                                   | Sanger                        | Sanger                   | Sanger                      | Sanger                                | PacBio                      |
| Reference                                              | unpublished                                | unpublished  | Huguet-Tapia <i>et al.</i> , 2016 | Booher <i>et al.</i> , 2015              | Salzberg <i>et al.</i> , 2008 | Lee <i>et al.</i> , 2005 | Ochiai <i>et al.</i> , 2005 | Bogdanove <i>et al.</i> , 2011        | Booher <i>et al.</i> , 2015 |
| BamHI                                                  | 769                                        | 756          | 750                               | 827                                      | 883                           | 815                      | 829                         | 845                                   | 885                         |
| ApaLI                                                  | 1671                                       | 1651         | 1637                              | 1596                                     | 1662                          | 1589                     | 1587                        | 1672                                  | 1693                        |
| SfoI                                                   | 4986                                       | 4959         | 4881                              | 4954                                     | 5223                          | 4941                     | 4980                        | 4165                                  | 4564                        |
| Total <sup>1</sup>                                     | 102                                        | 102          | 103                               | 108                                      | 123                           | 105                      | 109                         | 145                                   | 157                         |
| 2-5 kb <sup>2</sup>                                    | 15                                         | 15           | 15                                | 23                                       | 28                            | 21                       | 23                          | 31                                    | 27                          |
| Number of <i>tal</i> gene BamHI fragments <sup>3</sup> | 9                                          | 9            | 9                                 | 16                                       | 18                            | 13                       | 16                          | 27                                    | 23                          |
| Number of <i>tal</i> genes <sup>4</sup>                | 9                                          | 9            | 9                                 | 16 (2)                                   | 18 (1)                        | 13                       | 16 (1)                      | 27 (1)                                | 23 (1)                      |
| Percentage (BamHI fragments)                           | 1.2                                        | 1.2          | 1.2                               | 1.9                                      | 2.0                           | 1.6                      | 1.9                         | 3.2                                   | 2.6                         |
| Percentage (Total)                                     | 8.8                                        | 8.8          | 8.7                               | 14.8                                     | 14.6                          | 12.4                     | 14.7                        | 18.6                                  | 14.6                        |
| Percentage (2-5 kb)                                    | 60.0                                       | 60.0         | 60.0                              | 69.6                                     | 64.3                          | 61.9                     | 69.6                        | 87.1                                  | 85.2                        |

309 <sup>1</sup> Number of BamHI-fragments with BamHI-compatible overhangs predicted after combinational digestion with BamHI, ApaI and SfoI310 <sup>2</sup> Number of BamHI-fragments in the size range of 2 to 5 kb with BamHI-compatible overhangs predicted after combinational digestion with BamHI, ApaI  
311 and SfoI312 <sup>3</sup> Number of *tal* gene-related BamHI fragments predicted to be cloned following combinatorial digestion313 <sup>4</sup> Number of *tal* genes in the TALomes as published or predicted, including truncated *tal* genes (in brackets)

314 Table 2 | Efficiency of cloning of *tal* gene BamHI fragments from *X. oryzae* strains MAI1  
 315 and BAI3 upon different enrichment treatments

| Treatment                                           |                      |         |          |                    | Number of different cloned <i>tal</i> gene BamHI fragments |
|-----------------------------------------------------|----------------------|---------|----------|--------------------|------------------------------------------------------------|
| BamHI digestion                                     | +                    | +       | +        | +                  |                                                            |
| Gel purification of 2-5 kb DNA fragments            |                      | +       |          | +                  |                                                            |
| Double digestion with two counter-selection enzymes |                      |         | +        | +                  |                                                            |
| <b>Strain MAI1</b>                                  | 5 / 790 <sup>a</sup> | 5 / 630 | 10 / 324 | 28 / 89 & 34 / 136 | 9                                                          |
|                                                     | 0.6% <sup>b</sup>    | 0.8%    | 3.1%     | 31.5% & 25.0%      |                                                            |
| <b>Strain BAI3</b>                                  | nt                   | nt      | nt       | 57 / 212           | 8                                                          |
|                                                     |                      |         |          | 26.9%              |                                                            |

316 <sup>a</sup> Number of colonies with cloned *tal* gene BamHI fragments / number of analyzed colonies

317 <sup>b</sup> Percentage of colonies with cloned *tal* gene BamHI fragments

318 + indicates that the sample was treated as indicated on the left.

319 nt, not tested

320
